# Supplementary material for: Elucidating gas phase microstructures of therapeutic deep eutectic systems
Source: Royal Society of Chemistry journal article supplement (doi:10.1039/d4an00645c), 2025-01-01
Supplement: d4an00645c1.pdf [file d4an00645c1.pdf]

## DATA AND SOFTWARE AVAILABILITY

| Server/Software              | Function                                                  | Website                                                                                                                                     |
|------------------------------|-----------------------------------------------------------|---------------------------------------------------------------------------------------------------------------------------------------------|
| Gaussian09                   | Optimization, frequency and Gibbs free energy calculation | <a href="https://gaussian.com/glossary/g09/">https://gaussian.com/glossary/g09/</a>                                                         |
| Biovia Discovery Studio 2024 | Visualization of compound models and interactions         | <a href="https://www.3ds.com/products/biovia/discovery-studio/">https://www.3ds.com/products/biovia/discovery-studio/</a>                   |
| Origin Pro (2021)            | Plotting data, PCA                                        | <a href="https://www.originlab.com/2021">https://www.originlab.com/2021</a>                                                                 |
| Microsoft Excel              | Plotting data                                             | <a href="https://www.microsoft.com/en-us/microsoft-365/microsoft-office">https://www.microsoft.com/en-us/microsoft-365/microsoft-office</a> |
| YASARA Dynamics              | Molecular Dynamics Simulation And data analysis           | <a href="#">YASARA - Yet Another Scientific Artificial Reality Application</a>                                                              |

Any additional data will be provided by the corresponding author upon request.
